# Supplementary material for: The pseudogene DUXAP10 contributes to gefitinib resistance in NSCLC by repressing OAS2 expression: DUXAP10 contributes to gefitinib resistance by repressing OAS2
Source: PubMed Central journal article supplement (PMC10157544; doi:10.3724/abbs.2022176), 2022-11-25
Supplement: 087TableS1.pdf [file 087TableS1.pdf]

| Gene   | Gene. ID                     | AChange                              |
|--------|------------------------------|--------------------------------------|
| CYP2B6 | CYP2B6:NM 000767. 4:exon4    | p. Q172H (c. G516T)                  |
| CYP2B6 | CYP2B6:NM 000767. 4:exon5    | p. K262R (c. A785G)                  |
| CYP2D6 | CYP2D6:NM 001025161. 2:exon1 | p. P34S (c. C100T)                   |
| CYP3A5 | .                            | .                                    |
| ERCC1  | ERCC1:NM 202001. 2:exon3     | p. N118N (c. T354C)                  |
| GSTT1  | .                            | .                                    |
| MTHFR  | MTHFR:NM 005957. 4:exon5     | p. A222V (c. C665T)                  |
| UGT1A1 | UGT1A1:NM 000463. 2          | .                                    |
| XRCC1  | XRCC1:NM 006297. 2:exon10    | p. Q399R (c. A1196G)                 |
| CDKN2A | CDKN2A:NM 000077. 4:exon2    | p. G67V (c. G200T)                   |
| EGFR   | EGFR:NM 005228. 3:exon19     | p. 745 750del (c. 2235 2249delGGAAT) |
| HGF    | HGF:NM_000601. 4:exon6       | p. E210D (c. A630C)                  |
| TP53   | TP53:NM 001126112. 2:exon7   | p. R248Q (c. G743A)                  |
| EGFR   | .                            | .                                    |
| NRAS   | .                            | .                                    |

| ExonicFunc            | AF    |
|-----------------------|-------|
| missense variant      | .     |
| missense variant      | .     |
| missense variant      | .     |
| intron variant        | .     |
| synonymous variant    | .     |
| .                     | .     |
| missense variant      | .     |
| upstream gene variant | .     |
| missense variant      | .     |
| missense variant      | 99.6% |
| inframe deletion      | 56.4% |
| missense_variant      | 24.1% |
| missense variant      | 99.7% |
| .                     | .     |
| .                     | .     |
